# Supplementary material for: Fe– and Co–P4-embedded graphenes as electrocatalysts for the oxygen reduction reaction: theoretical insights
Source: Royal Society of Chemistry journal article supplement (doi:10.1039/c5cp05551b), 2015-01-01
Supplement: c5cp05551b1.pdf [file c5cp05551b1.pdf]

## Supporting Information

### **Fe- and Co-P<sub>4</sub>-embedded graphenes as electrocatalysts for the oxygen reduction reaction: theoretical insights**

Liyan Feng,<sup>a</sup> Yuejie Liu,<sup>b,\*</sup> Jingxiang Zhao,<sup>a,\*</sup>

<sup>a</sup> College of Chemistry and Chemical Engineering, Harbin Normal University, Harbin  
150025, China

<sup>b</sup> Modern Lab Center, Harbin Normal University, Harbin 150025, China

\* To whom correspondence should be addressed. Email: xjz\_hmily@163.com (JX);  
zhaojx1103@hotmail.com (YJ)

**Table S1.** Computed adsorption energies ( $E_{\text{ads}}$ , eV) of various ORR species on the surface of Fe-P<sub>4</sub> embedded graphene in 5 × 5 and 6 × 6 supercells.

| supercell        | 5 × 5 | 6 × 6 |
|------------------|-------|-------|
| O <sub>2</sub>   | -1.03 | -1.03 |
| OOH              | -2.04 | -2.07 |
| OH               | -3.19 | -3.22 |
| O                | -4.40 | -4.44 |
| H <sub>2</sub> O | -0.42 | -0.46 |
| H                | -2.61 | -2.63 |
| HOOH             | -2.53 | -2.55 |

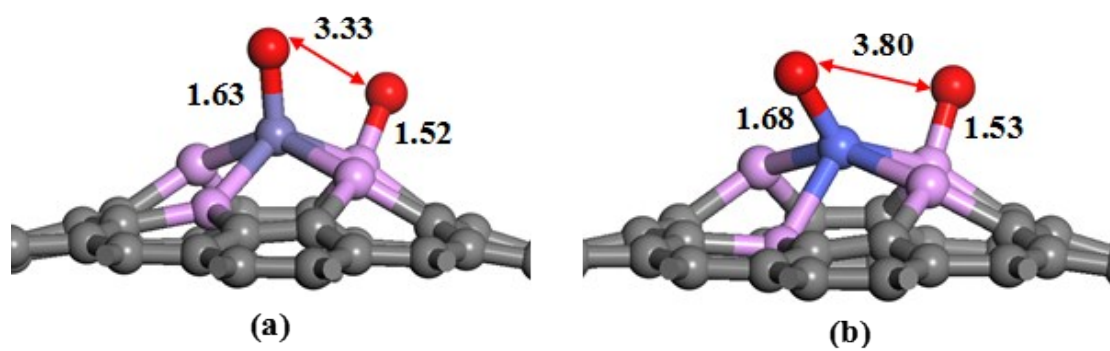

**Figure S1.** The optimized structures of the products O<sub>2</sub> dissociation on (a) Fe- and (b) Co-P<sub>4</sub> embedded graphenes.

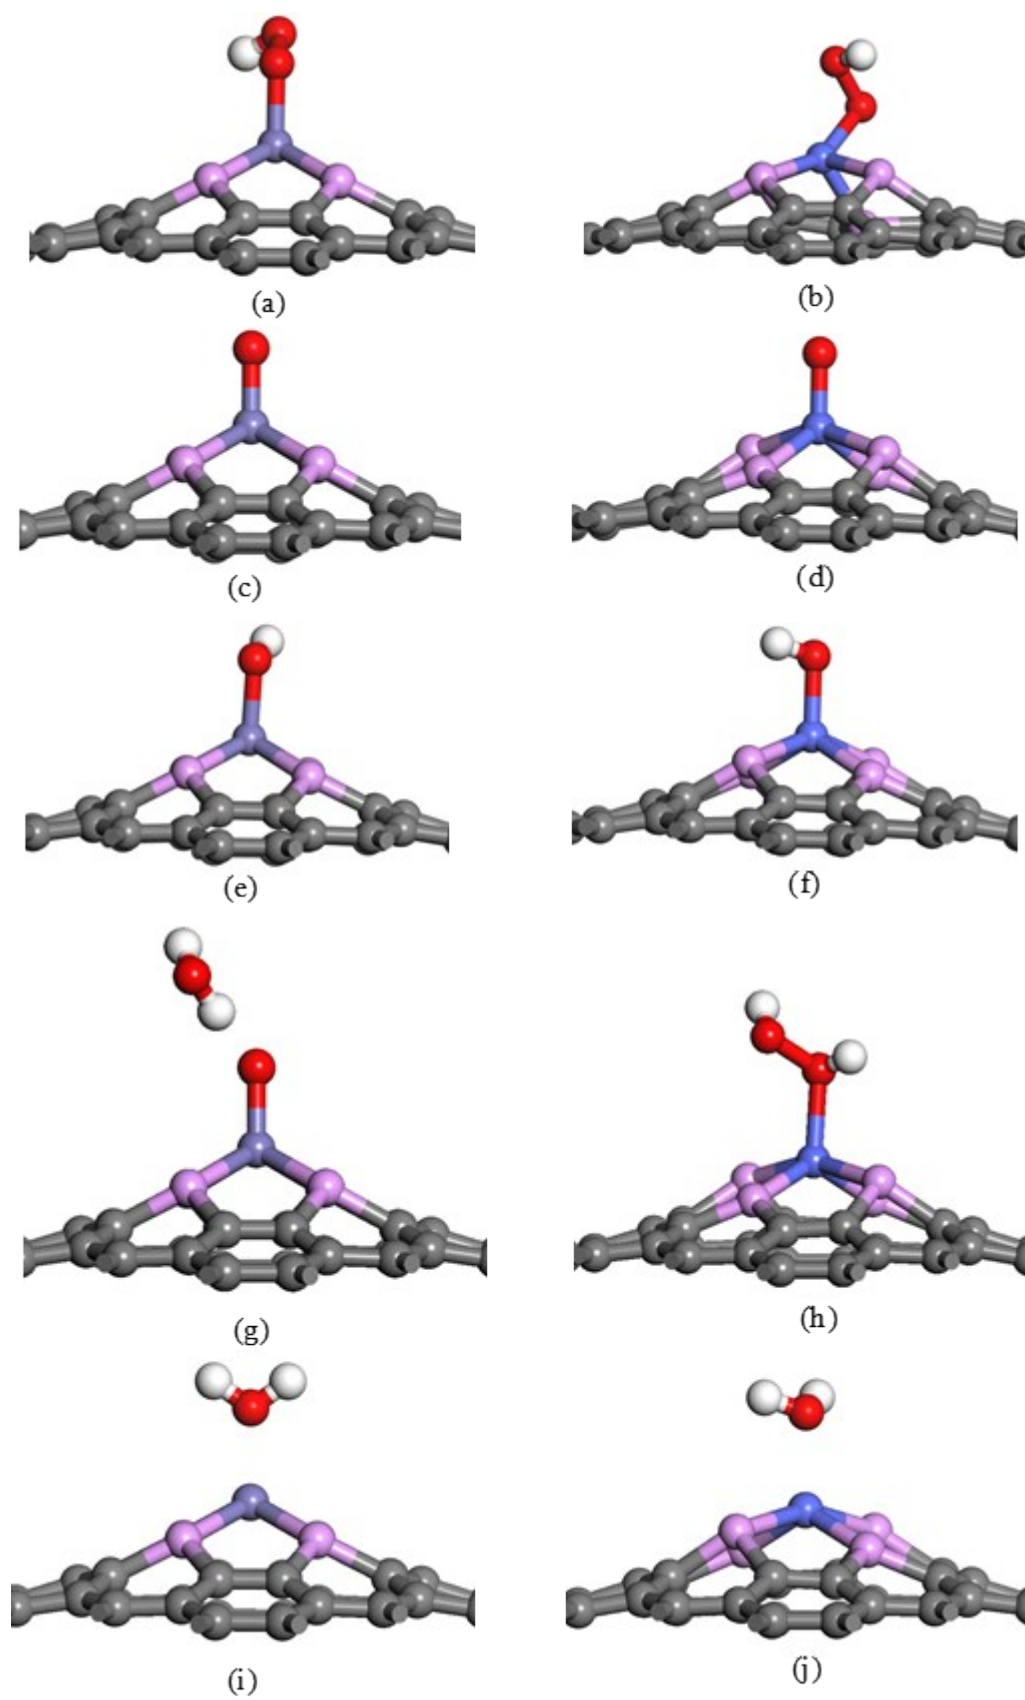

**Figure S2.** The optimized structures of OOH, O, OH, HOOH, and H<sub>2</sub>O adsorption on Fe- (left) and Co-P<sub>4</sub> (right) embedded graphenes.

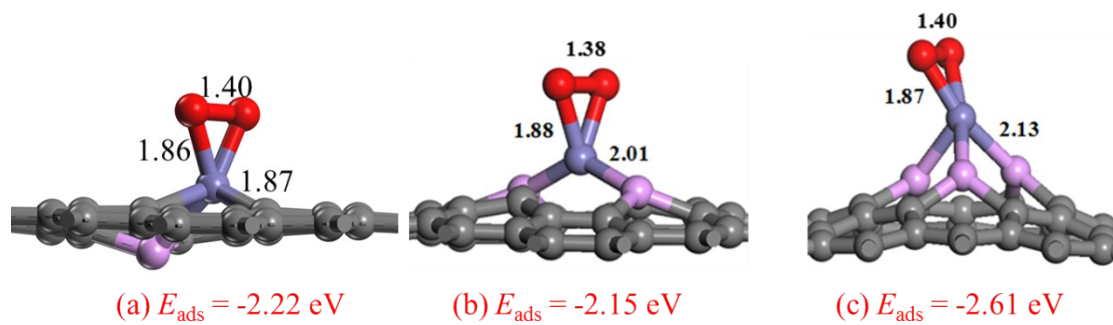

**Figure S3.** The optimized configurations of  $\text{O}_2$  adsorption on (a) Fe-P<sub>1</sub>, (b) Fe-P<sub>2</sub>, and (c) Fe-P<sub>3</sub> embedded graphenes.

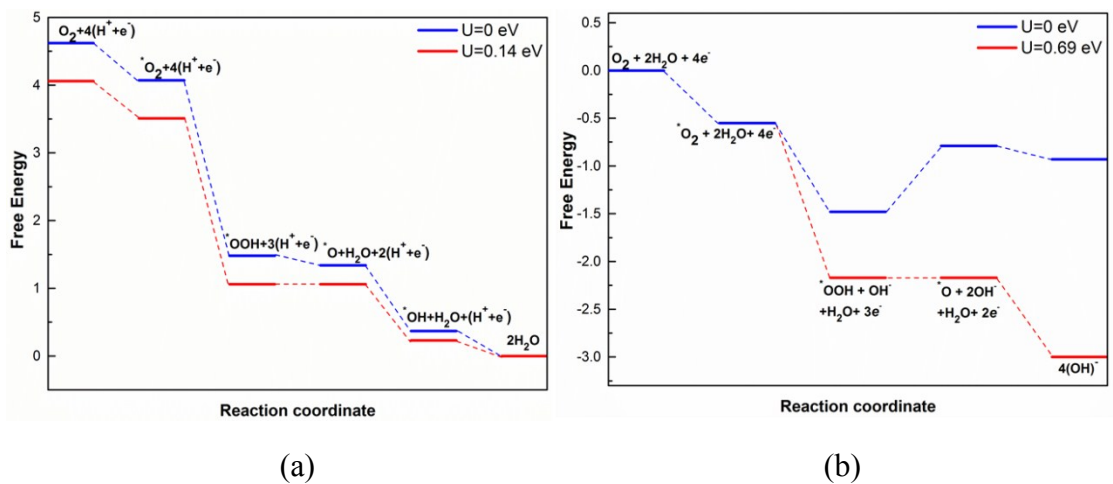

**Figure S4:** Free energy diagram for the ORR on Fe- $P_4$  embedded graphene in (a) acid media and (b) alkaline media under 5% strain.
